# Supplementary material for: Antifungal tolerance is a subpopulation effect distinct from resistance and is associated with persistent candidemia
Source: PubMed Central journal article supplement (PMC6018213; doi:10.1038/s41467-018-04926-x), 2018-06-25
Supplement: 41467_2018_4926_MOESM2_ESM.pdf [file 41467_2018_4926_MOESM2_ESM.pdf]

## Description of Additional Supplementary Files

File Name: Supplementary Data 1

Description: Strains used in this study.

File Name: Supplementary Data 1

Description: Detailed clinical information on persistent and nonpersistent isolates, including MIC levels, antifungal therapy, catheter information and coexisting exposures.

File Name: Supplementary Movie 1

Description: Time-lapse video of P87 cells in FLC. This strain has low FoG (FoG=0.29, RAD=18). Cells were plated in liquid casitone medium containing 10 µg/ml FLC, which is ~20-fold above their MIC levels.

File Name: Supplementary Movie 2

Description: Time-lapse video of AM2 cells in FLC. This strain has medium FoG (FoG=0.41, RAD=17). Cells were plated in liquid casitone medium containing 10 µg/ml FLC, which is ~20-fold above their MIC levels.

File Name: Supplementary Movie 3

Description: Time-lapse video of P78 cells in FLC. This strain has medium-high FoG (FoG=0.62, RAD=18.5). Cells were plated in liquid casitone medium containing 10 µg/ml FLC, which is ~20-fold above their MIC levels.

File Name: Supplementary Movie 4

Description: Time-lapse video of SC5314 cells in FLC. This strain has high FoG (FoG=0.68, RAD=18). Cells were plated in liquid casitone medium containing 10 µg/ml FLC, which is ~20-fold above their MIC levels.
